# Supplementary material for: Nanocrystallization of lanthanide-doped KLu2F7–KYb2F7 solid-solutions in aluminosilicate glass for upconverted solid-state-lighting and photothermal anti-counterfeiting
Source: Royal Society of Chemistry journal article supplement (doi:10.1039/c9tc05493f), 2019-01-01
Supplement: c9tc05493f1.pdf [file c9tc05493f1.pdf]

# Electronic Supporting Information

## **Nanocrystallization of Lanthanide-Doped $\text{KLu}_2\text{F}_7$ - $\text{KYb}_2\text{F}_7$ Solid-Solutions in Aluminosilicate Glass for Upconverted Solid-State-Lighting and Photothermal Anti-Counterfeiting**

Shaoxiong Wang<sup>a,b,c</sup>, Jiangkun Chen<sup>a,b,c</sup>, Jidong Lin<sup>a,b,c</sup>, Changbin Yang<sup>a,b,c</sup>, Feng Huang<sup>a,b,c</sup>, Daqin Chen<sup>a,b,c,\*</sup>

<sup>a</sup> College of Physics and Energy, Fujian Normal University, Fujian Provincial Key Laboratory of Quantum Manipulation and New Energy Materials, Fuzhou, 350117, China

\*Corresponding author. E-Mail: [dqchen@fjnu.edu.cn](mailto:dqchen@fjnu.edu.cn)

<sup>b</sup> Fujian Provincial Collaborative Innovation Center for Optoelectronic Semiconductors and Efficient Devices, Xiamen, 361005, China

<sup>c</sup> Fujian Provincial Engineering Technology Research Center of Solar Energy Conversion and Energy Storage, Fuzhou, 350117, China

**Table S1** Nominal glass compositions (mol%) for the investigated samples and the corresponding crystallization phases after heat-treatment at 750 °C for 2h. Cub and orth represent cubic and orthorhombic phases, respectively.

| Glass compositions<br>(mol%)                                                                                       | Crystallization phase                                                                               |                                                                                                     |
|--------------------------------------------------------------------------------------------------------------------|-----------------------------------------------------------------------------------------------------|-----------------------------------------------------------------------------------------------------|
|                                                                                                                    | As-quenched                                                                                         | Heat-treatment<br>(750°C/2h)                                                                        |
| 100SiO <sub>2</sub> -6Al <sub>2</sub> O <sub>3</sub> -9K <sub>2</sub> O-19KF-16LuF <sub>3</sub> -9LaF <sub>3</sub> | Cub-K(Lu/La) <sub>3</sub> F <sub>10</sub>                                                           | Cub-K(Lu/La) <sub>3</sub> F <sub>10</sub>                                                           |
| 100SiO <sub>2</sub> -6Al <sub>2</sub> O <sub>3</sub> -9K <sub>2</sub> O-19KF-16LuF <sub>3</sub> -9CeF <sub>3</sub> | Cub-K(Lu/Ce) <sub>3</sub> F <sub>10</sub>                                                           | Cub-K(Lu/Ce) <sub>3</sub> F <sub>10</sub>                                                           |
| 100SiO <sub>2</sub> -6Al <sub>2</sub> O <sub>3</sub> -9K <sub>2</sub> O-19KF-16LuF <sub>3</sub> -9PrF <sub>3</sub> | Cub-K(Lu/Pr) <sub>3</sub> F <sub>10</sub>                                                           | Cub-K(Lu/Pr) <sub>3</sub> F <sub>10</sub>                                                           |
| 100SiO <sub>2</sub> -6Al <sub>2</sub> O <sub>3</sub> -9K <sub>2</sub> O-19KF-16LuF <sub>3</sub> -9NdF <sub>3</sub> | Cub-K(Lu/Nd) <sub>3</sub> F <sub>10</sub>                                                           | Cub-K(Lu/Nd) <sub>3</sub> F <sub>10</sub>                                                           |
| 100SiO <sub>2</sub> -6Al <sub>2</sub> O <sub>3</sub> -9K <sub>2</sub> O-19KF-16LuF <sub>3</sub> -9SmF <sub>3</sub> | Cub-K(Lu/Sm) <sub>3</sub> F <sub>10</sub>                                                           | Cub-K(Lu/Sm) <sub>3</sub> F <sub>10</sub>                                                           |
| 100SiO <sub>2</sub> -6Al <sub>2</sub> O <sub>3</sub> -9K <sub>2</sub> O-19KF-16LuF <sub>3</sub> -9EuF <sub>3</sub> | Cub-K(Lu/Eu) <sub>3</sub> F <sub>10</sub>                                                           | Cub-K(Lu/Eu) <sub>3</sub> F <sub>10</sub>                                                           |
| 100SiO <sub>2</sub> -6Al <sub>2</sub> O <sub>3</sub> -9K <sub>2</sub> O-19KF-16LuF <sub>3</sub> -9GdF <sub>3</sub> | Cub-K(Lu/Gd) <sub>3</sub> F <sub>10</sub>                                                           | Cub-K(Lu/Gd) <sub>3</sub> F <sub>10</sub>                                                           |
| 100SiO <sub>2</sub> -6Al <sub>2</sub> O <sub>3</sub> -9K <sub>2</sub> O-19KF-16LuF <sub>3</sub> -9TbF <sub>3</sub> | Cub-K(Lu/Tb) <sub>3</sub> F <sub>10</sub> <sup>+</sup><br>Orth-K(Lu/Tb) <sub>2</sub> F <sub>7</sub> | Cub-K(Lu/Tb) <sub>3</sub> F <sub>10</sub> <sup>+</sup><br>Orth-K(Lu/Tb) <sub>2</sub> F <sub>7</sub> |
| 100SiO <sub>2</sub> -6Al <sub>2</sub> O <sub>3</sub> -9K <sub>2</sub> O-19KF-16LuF <sub>3</sub> -9DyF <sub>3</sub> | Cub-K(Lu/Dy) <sub>3</sub> F <sub>10</sub> <sup>+</sup><br>Orth-K(Lu/Dy) <sub>2</sub> F <sub>7</sub> | Cub-K(Lu/Dy) <sub>3</sub> F <sub>10</sub> <sup>+</sup><br>Orth-K(Lu/Dy) <sub>2</sub> F <sub>7</sub> |
| 100SiO <sub>2</sub> -6Al <sub>2</sub> O <sub>3</sub> -9K <sub>2</sub> O-19KF-16LuF <sub>3</sub> -9HoF <sub>3</sub> | Cub-K(Lu/Ho) <sub>3</sub> F <sub>10</sub> <sup>+</sup><br>Orth-K(Lu/Ho) <sub>2</sub> F <sub>7</sub> | Cub-K(Lu/Ho) <sub>3</sub> F <sub>10</sub> <sup>+</sup><br>Orth-K(Lu/Ho) <sub>2</sub> F <sub>7</sub> |
| 100SiO <sub>2</sub> -6Al <sub>2</sub> O <sub>3</sub> -9K <sub>2</sub> O-19KF-16LuF <sub>3</sub> -9YF <sub>3</sub>  | Cub-K(Lu/Y) <sub>3</sub> F <sub>10</sub> <sup>+</sup><br>Orth-K(Lu/Y) <sub>2</sub> F <sub>7</sub>   | Cub-K(Lu/Y) <sub>3</sub> F <sub>10</sub> <sup>+</sup><br>Orth-K(Lu/Y) <sub>2</sub> F <sub>7</sub>   |
| 100SiO <sub>2</sub> -6Al <sub>2</sub> O <sub>3</sub> -9K <sub>2</sub> O-19KF-16LuF <sub>3</sub> -9ErF <sub>3</sub> | Orth-K(Lu/Er) <sub>2</sub> F <sub>7</sub>                                                           | Orth-K(Lu/Er) <sub>2</sub> F <sub>7</sub>                                                           |
| 100SiO <sub>2</sub> -6Al <sub>2</sub> O <sub>3</sub> -9K <sub>2</sub> O-19KF-16LuF <sub>3</sub> -9TmF <sub>3</sub> | Orth-K(Lu/Tm) <sub>2</sub> F <sub>7</sub>                                                           | Orth-K(Lu/Tm) <sub>2</sub> F <sub>7</sub>                                                           |
| 100SiO <sub>2</sub> -6Al <sub>2</sub> O <sub>3</sub> -9K <sub>2</sub> O-19KF-16LuF <sub>3</sub> -9YbF <sub>3</sub> | Orth-K(Lu/Yb) <sub>2</sub> F <sub>7</sub>                                                           | Orth-K(Lu/Yb) <sub>2</sub> F <sub>7</sub>                                                           |
| 100SiO <sub>2</sub> -6Al <sub>2</sub> O <sub>3</sub> -9K <sub>2</sub> O-19KF-16LuF <sub>3</sub> -9LuF <sub>3</sub> | Orth-KLu <sub>2</sub> F <sub>7</sub>                                                                | Orth-KLu <sub>2</sub> F <sub>7</sub>                                                                |
| 100SiO <sub>2</sub> -6Al <sub>2</sub> O <sub>3</sub> -9K <sub>2</sub> O-19KF-16LuF <sub>3</sub> -9ScF <sub>3</sub> | Orth-K(Lu/Sc) <sub>2</sub> F <sub>7</sub>                                                           | Orth-K(Lu/Sc) <sub>2</sub> F <sub>7</sub>                                                           |

**Table S2** Effective ionic radius of Ln<sup>3+</sup> in fluorine environment (Z=6)

|                 |                  |                  |                  |                  |                  |                  |                  |                  |
|-----------------|------------------|------------------|------------------|------------------|------------------|------------------|------------------|------------------|
| Lanthanide ions | La <sup>3+</sup> | Ce <sup>3+</sup> | Pr <sup>3+</sup> | Nd <sup>3+</sup> | Sm <sup>3+</sup> | Eu <sup>3+</sup> | Gd <sup>3+</sup> | Tb <sup>3+</sup> |
| Radius (Å)      | 1.19             | 1.15             | 1.14             | 1.12             | 1.10             | 1.109            | 1.08             | 1.06             |
| Lanthanide ions | Dy <sup>3+</sup> | Ho <sup>3+</sup> | Y <sup>3+</sup>  | Er <sup>3+</sup> | Tm <sup>3+</sup> | Yb <sup>3+</sup> | Lu <sup>3+</sup> | Sc <sup>3+</sup> |
| Radius (Å)      | 1.05             | 1.04             | 1.04             | 1.03             | 1.02             | 1.01             | 1.00             | 0.89             |

**Table S3** Nominal glass compositions (mol%) for the Lu-Yb solid-solution NCs@glass samples and the corresponding crystallization phases after heat-treatment at 750 °C for 2h. Orth represents orthorhombic phases.

| Samples | Glass compositions<br>(mol%)                                                                                                   | Crystallization phase                     |
|---------|--------------------------------------------------------------------------------------------------------------------------------|-------------------------------------------|
|         |                                                                                                                                | GC (750°C/2h)                             |
| 0%Yb    | 100SiO <sub>2</sub> -6Al <sub>2</sub> O <sub>3</sub> -9K <sub>2</sub> O-19KF-24LuF <sub>3</sub> -0YbF <sub>3</sub> -0.48Er     | Orth-KLu <sub>2</sub> F <sub>7</sub>      |
| 10%Yb   | 100SiO <sub>2</sub> -6Al <sub>2</sub> O <sub>3</sub> -9K <sub>2</sub> O-19KF-21.6LuF <sub>3</sub> -2.4YbF <sub>3</sub> -0.48Er | Orth-K(Lu/Yb) <sub>2</sub> F <sub>7</sub> |
| 20%Yb   | 100SiO <sub>2</sub> -6Al <sub>2</sub> O <sub>3</sub> -9K <sub>2</sub> O-19KF-19.2LuF <sub>3</sub> -4.8YbF <sub>3</sub> -0.48Er | Orth-K(Lu/Yb) <sub>2</sub> F <sub>7</sub> |
| 30%Yb   | 100SiO <sub>2</sub> -6Al <sub>2</sub> O <sub>3</sub> -9K <sub>2</sub> O-19KF-16.8LuF <sub>3</sub> -7.2YbF <sub>3</sub> -0.48Er | Orth-K(Lu/Yb) <sub>2</sub> F <sub>7</sub> |
| 40%Yb   | 100SiO <sub>2</sub> -6Al <sub>2</sub> O <sub>3</sub> -9K <sub>2</sub> O-19KF-14.4LuF <sub>3</sub> -9.6YbF <sub>3</sub> -0.48Er | Orth-K(Lu/Yb) <sub>2</sub> F <sub>7</sub> |
| 50%Yb   | 100SiO <sub>2</sub> -6Al <sub>2</sub> O <sub>3</sub> -9K <sub>2</sub> O-19KF-12LuF <sub>3</sub> -12YbF <sub>3</sub> -0.48Er    | Orth-K(Lu/Yb) <sub>2</sub> F <sub>7</sub> |
| 60%Yb   | 100SiO <sub>2</sub> -6Al <sub>2</sub> O <sub>3</sub> -9K <sub>2</sub> O-19KF-9.6LuF <sub>3</sub> -14.4YbF <sub>3</sub> -0.48Er | Orth-K(Lu/Yb) <sub>2</sub> F <sub>7</sub> |
| 70%Yb   | 100SiO <sub>2</sub> -6Al <sub>2</sub> O <sub>3</sub> -9K <sub>2</sub> O-19KF-7.2LuF <sub>3</sub> -16.8YbF <sub>3</sub> -0.48Er | Orth-K(Lu/Yb) <sub>2</sub> F <sub>7</sub> |
| 80%Yb   | 100SiO <sub>2</sub> -6Al <sub>2</sub> O <sub>3</sub> -9K <sub>2</sub> O-19KF-4.8LuF <sub>3</sub> -19.2YbF <sub>3</sub> -0.48Er | Orth-K(Lu/Yb) <sub>2</sub> F <sub>7</sub> |
| 90%Yb   | 100SiO <sub>2</sub> -6Al <sub>2</sub> O <sub>3</sub> -9K <sub>2</sub> O-19KF-2.4LuF <sub>3</sub> -21.6YbF <sub>3</sub> -0.48Er | Orth-K(Lu/Yb) <sub>2</sub> F <sub>7</sub> |
| 100%Yb  | 100SiO <sub>2</sub> -6Al <sub>2</sub> O <sub>3</sub> -9K <sub>2</sub> O-19KF-0LuF <sub>3</sub> -24YbF <sub>3</sub> -0.48Er     | Orth-KYb <sub>2</sub> F <sub>7</sub>      |

**Table S4** Color coordinates for laser power dependent UC luminescence yielded from the Er: KYb<sub>2</sub>F<sub>7</sub> NCs@glass under irradiation of 980 nm laser.

| Laser power density (W/cm <sup>2</sup> ) | CIE x  | CIE y  |
|------------------------------------------|--------|--------|
| 23                                       | 0.5407 | 0.4437 |
| 66                                       | 0.5318 | 0.4558 |
| 113                                      | 0.5166 | 0.4630 |
| 159                                      | 0.4943 | 0.4860 |
| 211                                      | 0.4650 | 0.5110 |
| 245                                      | 0.4336 | 0.5313 |
| 276                                      | 0.4284 | 0.5411 |

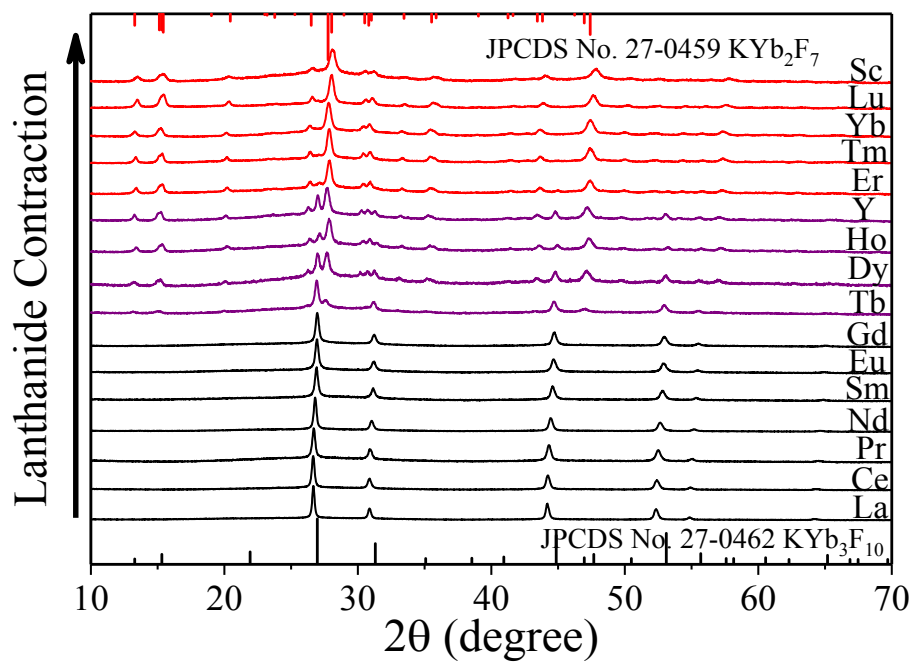

**Figure S1** XRD patterns of a series of PGs containing  $\text{Ln}^{3+}$  dopants ( $\text{Ln}=\text{La-Lu, Sc}$ ). The diffraction bars represent cubic  $\text{KYb}_3\text{F}_{10}$  (JPCDS No. 27-0462) and orthorhombic  $\text{KYb}_2\text{F}_7$  (JPCDS No. 27-0459) crystals. Lu-Ln solid-solution fluorides have precipitated inside glass, indicating that self-crystallization has already occurred in these precursor glasses.

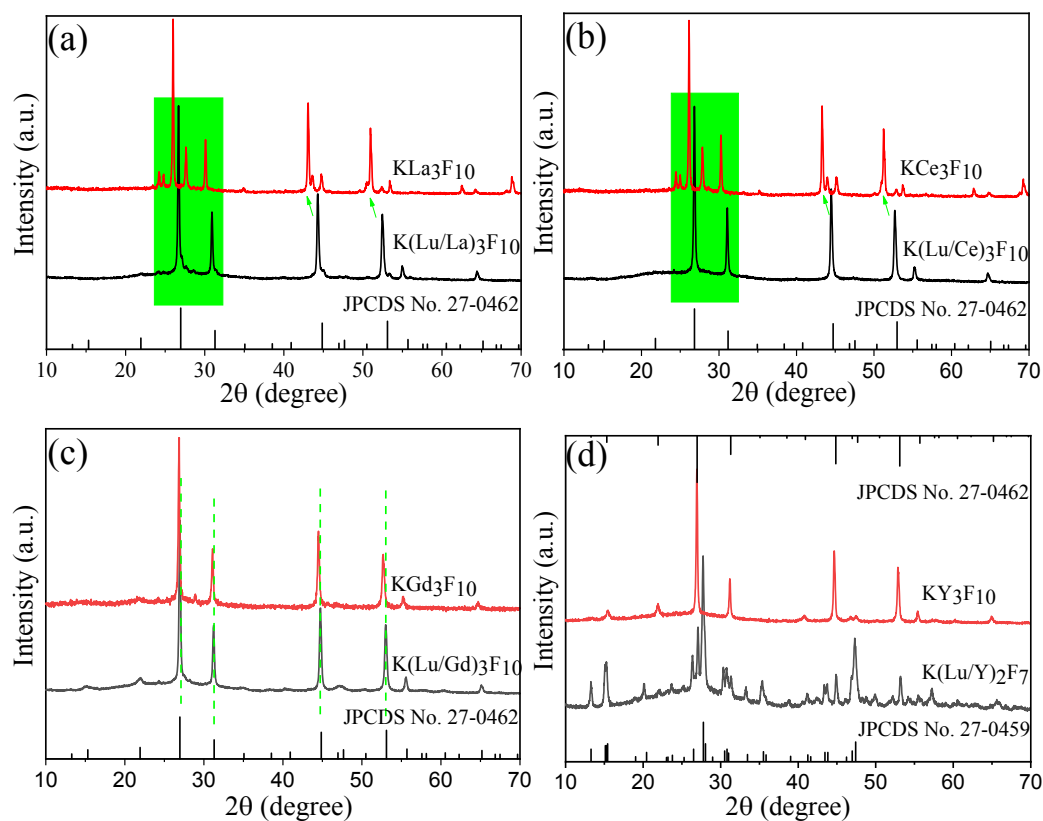

**Figure S2** Comparison of XRD patterns of NCs@glass samples with/without the addition of  $\text{LuF}_3$ . The glass compositions without  $\text{LuF}_3$  are  $100\text{SiO}_2\text{-}6\text{Al}_2\text{O}_3\text{-}9\text{K}_2\text{O}\text{-}19\text{KF}\text{-}25\text{LnF}_3$ : (a)  $\text{Ln}=\text{La}$ , (b)  $\text{Ln}=\text{Ce}$ , (c)  $\text{Ln}=\text{Gd}$ , and (d)  $\text{Ln}=\text{Y}$ . The diffraction bars represent cubic  $\text{KYb}_3\text{F}_{10}$  (JPCDS No. 27-0462) and orthorhombic  $\text{KYb}_2\text{F}_7$  (JPCDS No. 27-0459) crystals. With the addition of  $\text{LuF}_3$ , the diffraction peaks shift towards large angles, pure cubic phases are obtained for Lu-La, Lu-Ce and Lu-Gd samples and extra orthorhombic phase occurs for Lu-Y sample, verifying that the crystallized phases in glasses are indeed Lu-Ln fluoride solid-solutions and  $\text{Lu}^{3+}$  ions are beneficial for the growth of pure  $\text{K}(\text{Lu}/\text{Ln})_3\text{F}_{10}$  or  $\text{K}(\text{Lu}/\text{Ln})_2\text{F}_7$  solid-solutions.

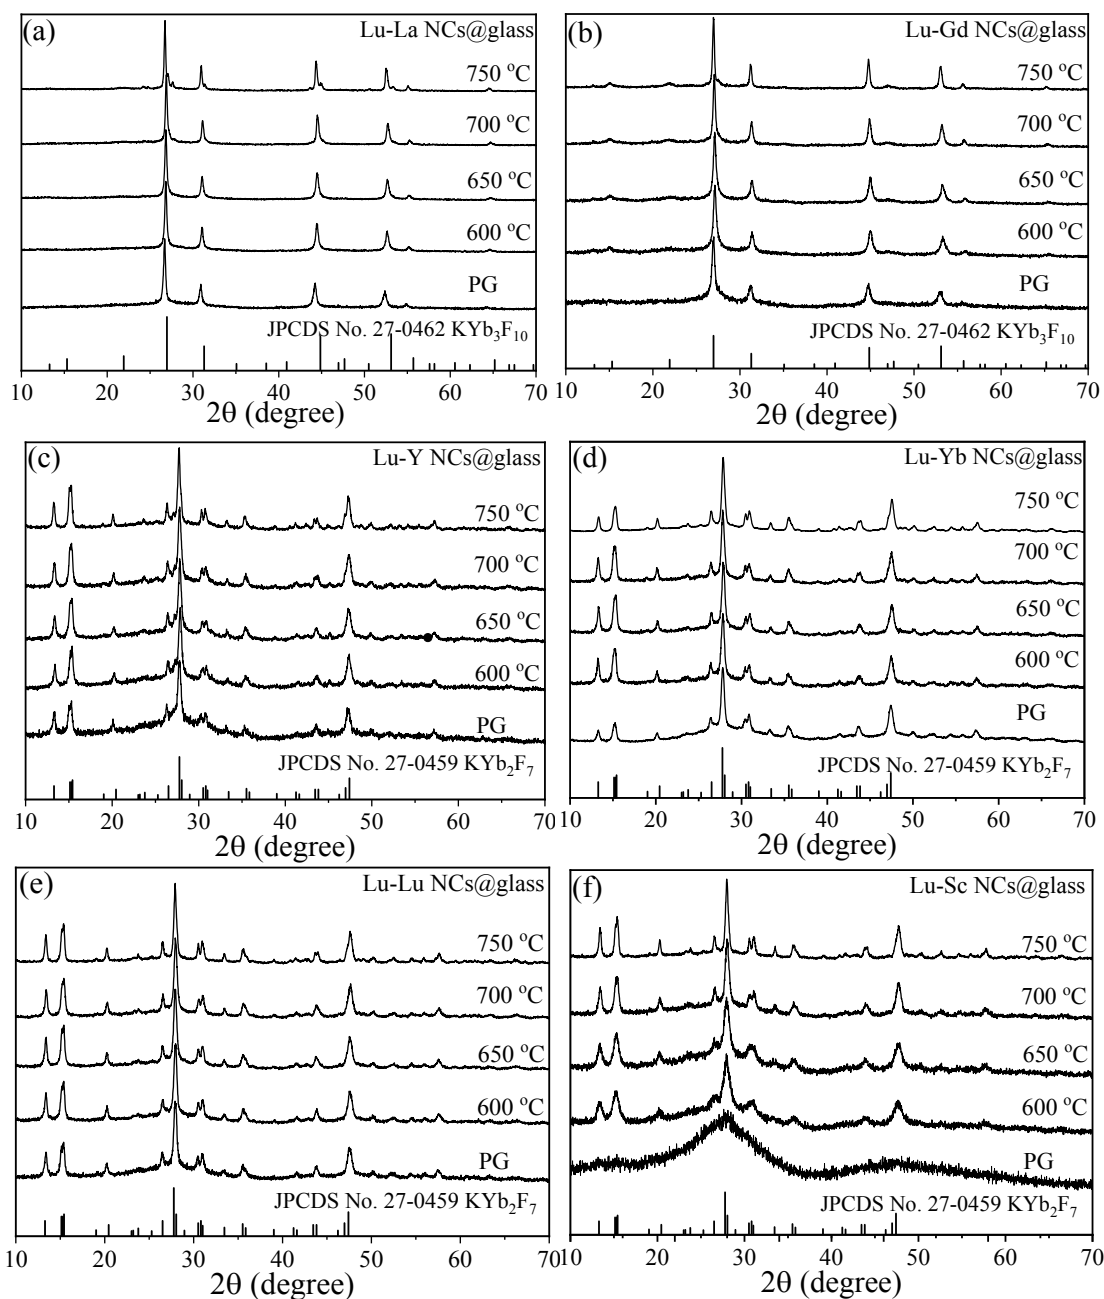

**Figure S3** XRD patterns of PGs and Lu-Ln NCs@glass samples prepared by heat-treatment at various temperatures (600, 650, 700, 750 °C) for 2 h: (a) Ln=La, (b) Ln=Gd, (c) Ln=Y, (d) Ln=Yb, (e) Ln=Lu and (f) Ln=Sc.

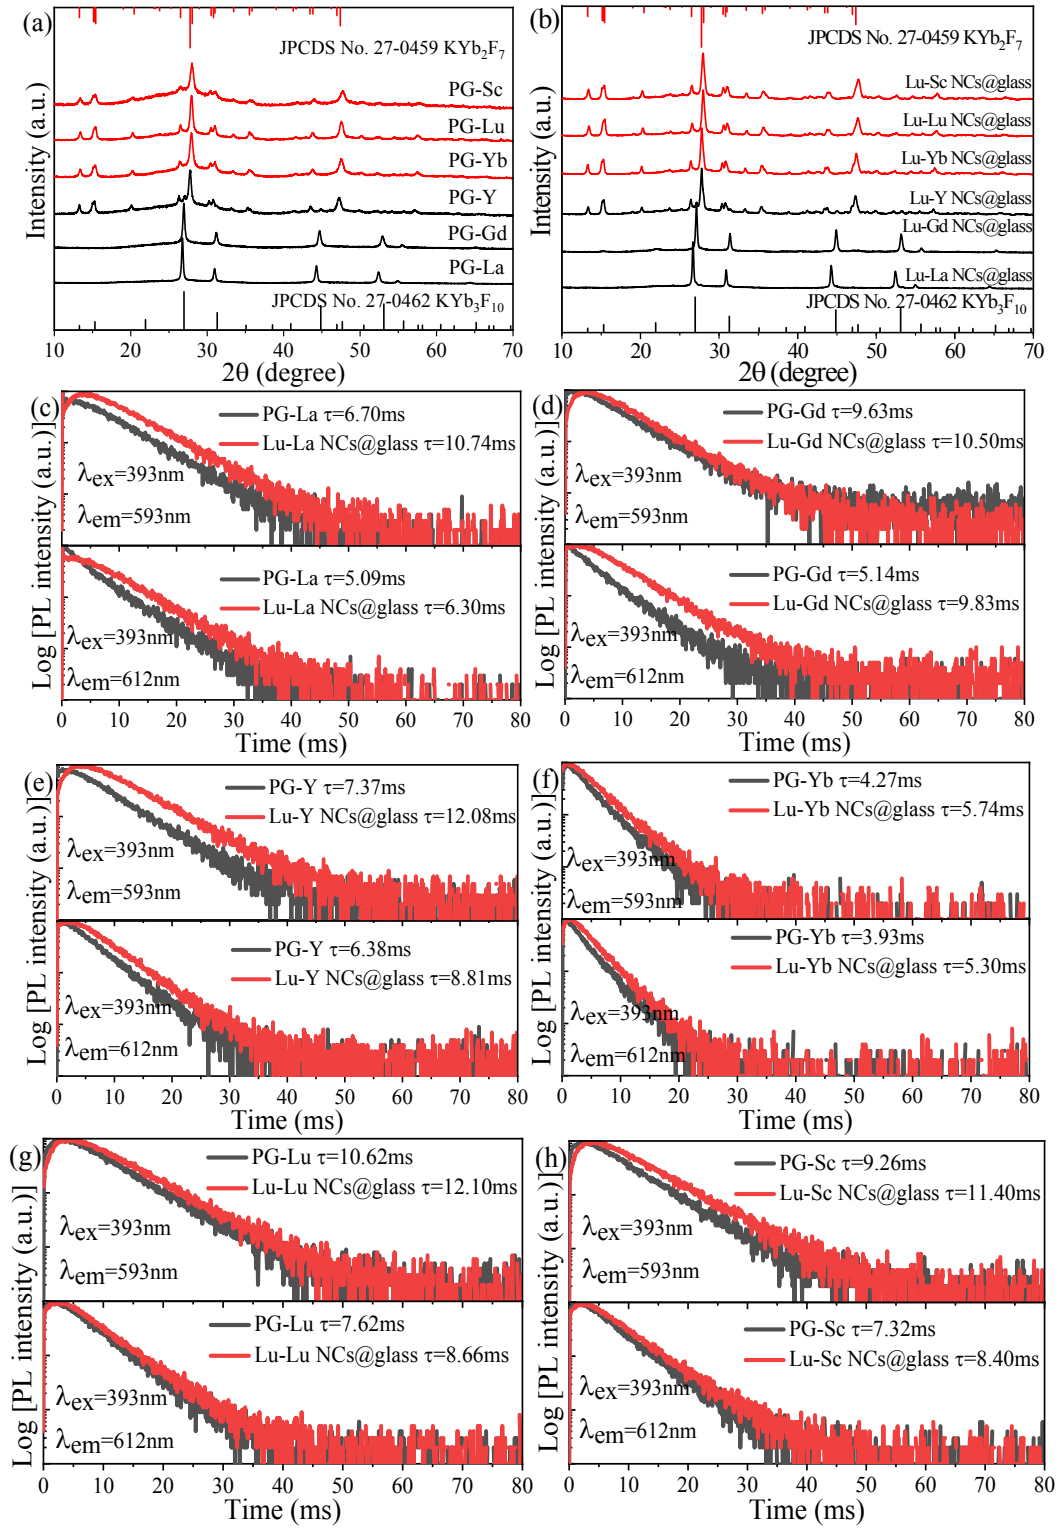

**Figure S4** XRD patterns of (a) Eu<sup>3+</sup> doped PGs and (b) Lu-Ln NCs@glass samples prepared by heating PGs at 750 °C for 2 h. Decay curves ( $\lambda_{ex}$ =393 nm) for the corresponding samples by monitoring Eu<sup>3+</sup> <sup>5</sup>D<sub>0</sub>→<sup>7</sup>F<sub>1</sub> ( $\lambda_{em}$ =593 nm) and <sup>5</sup>D<sub>0</sub>→<sup>7</sup>F<sub>2</sub> ( $\lambda_{em}$ =612 nm) transitions, respectively: (c) Ln=La, (d) Ln=Gd, (e) Ln=Y, (f) Ln=Yb, (g) Ln=Lu and (h) Ln=Sc.

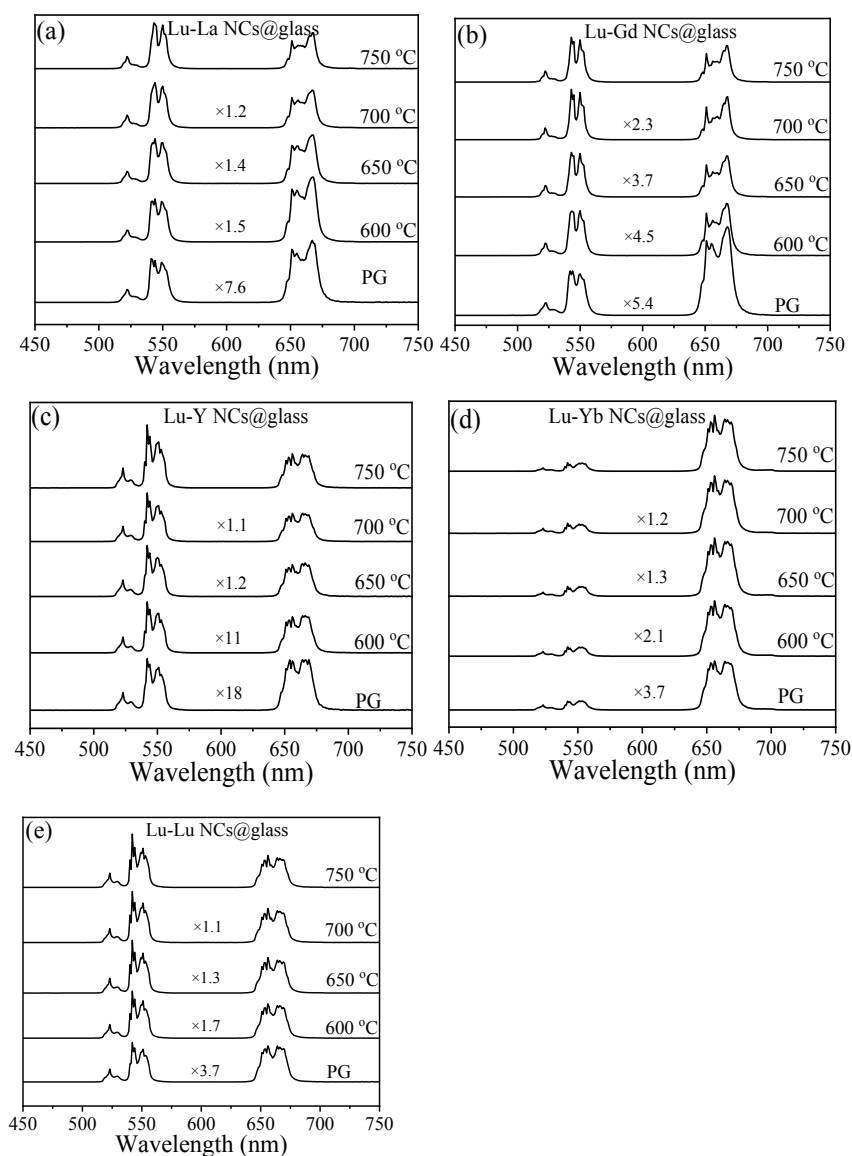

**Figure S5** UC emission spectra ( $\lambda_{\text{ex}} = 980 \text{ nm}$ ) of PGs and Lu-Ln NCs@glass samples prepared by heat-treatment at various temperatures (600, 650, 700, 750 °C) for 2 h: (a) Ln=La, (b) Ln=Gd, (c) Ln=Y, (d) Ln=Yb and (e) Ln=Lu. The glass compositions (mol %) are 100SiO<sub>2</sub>-6Al<sub>2</sub>O<sub>3</sub>-9K<sub>2</sub>O-19KF-16LuF<sub>3</sub>-9LnF<sub>3</sub>-1YbF<sub>3</sub>-0.32ErF<sub>3</sub> (Ln=La, Gd, Y, Yb, Lu).



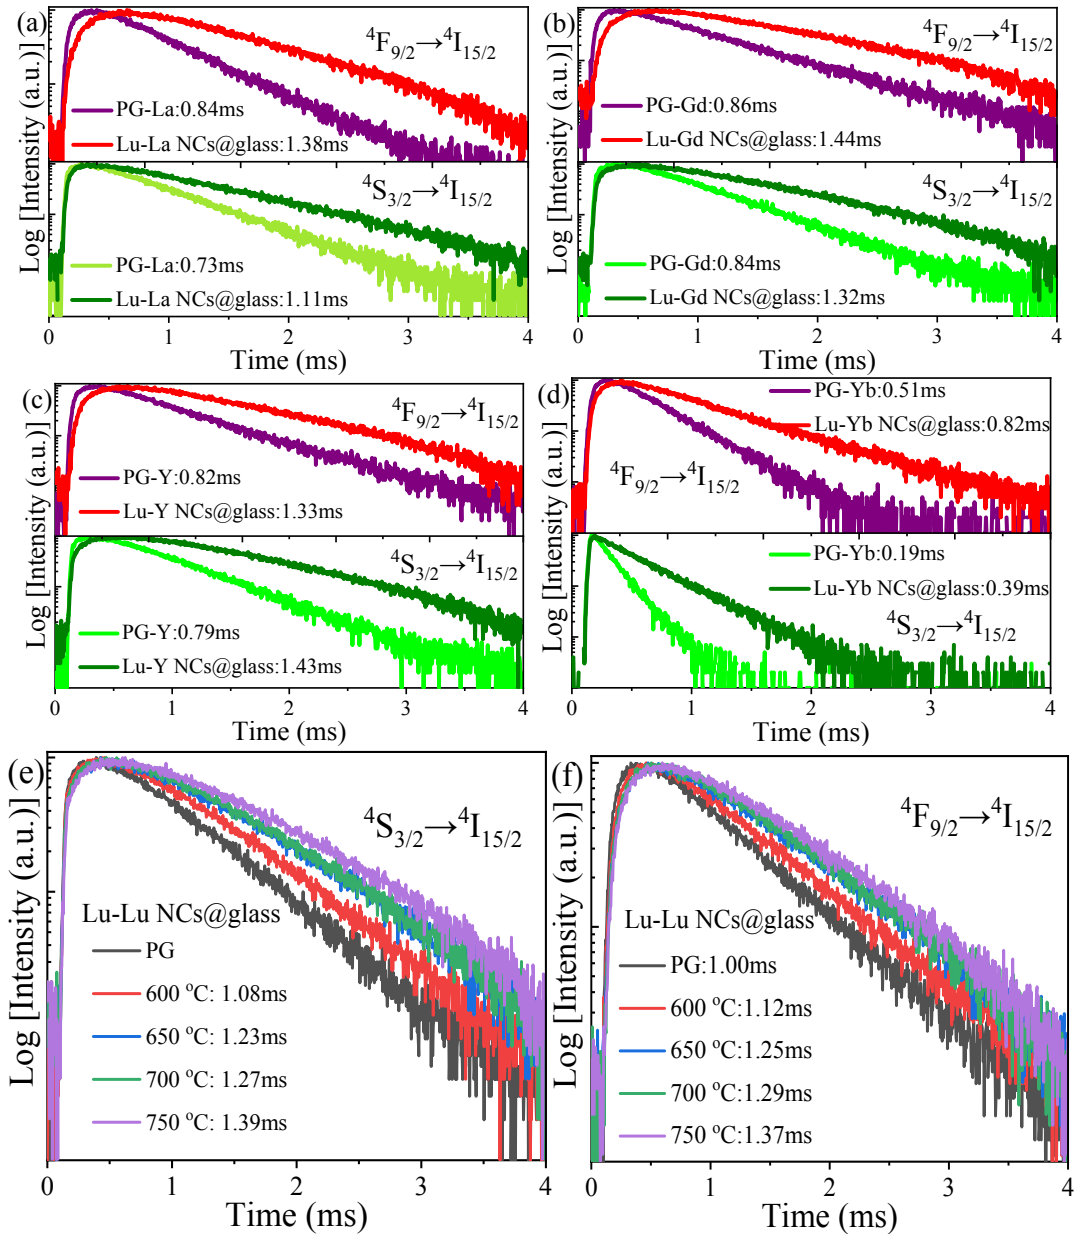

**Figure S6** UC decay curves of PGs and Lu-Ln NCs@glass samples by monitoring Er<sup>3+</sup> green ( $^4S_{3/2} \rightarrow ^4I_{15/2}$ ) and red ( $^4F_{9/2} \rightarrow ^4I_{15/2}$ ) emissions, respectively: (a) Ln=La, (b) Ln=Gd, (c) Ln=Y, (d) Ln=Yb and (e, f) Ln=Lu.

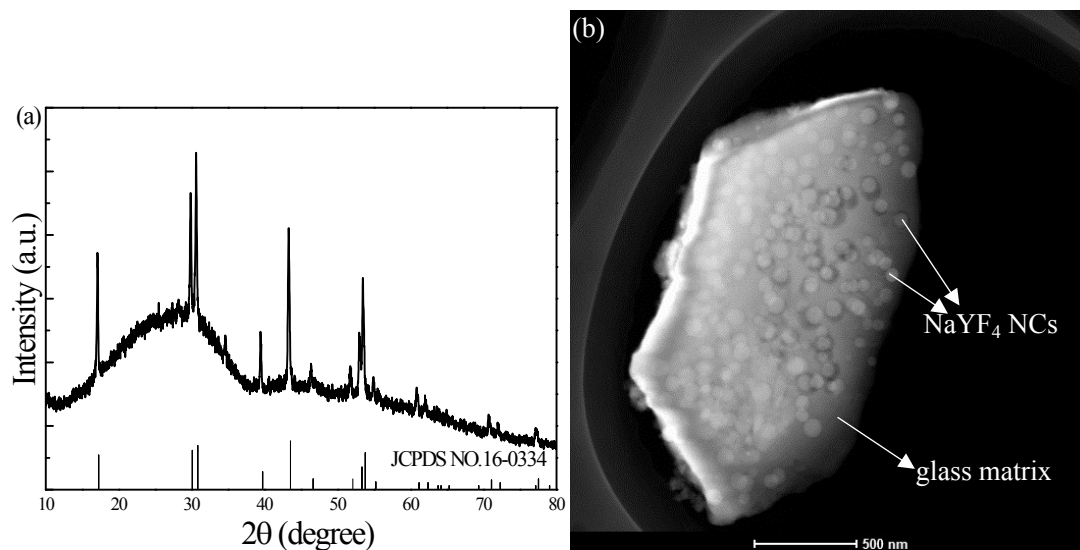

**Figure S7** (a) XRD pattern and (b) HAADF-STEM image of Yb/Er: NaYF<sub>4</sub>@glass sample. Bars represent diffraction data of hexagonal β-NaYF<sub>4</sub> crystal (JCPDS No. 16-0334). The precipitated phase inside glass is hexagonal NaYF<sub>4</sub>, and the particle sizes are in the range of 40~100 nm.

The glass composite for the Yb/Er: NaYF<sub>4</sub>@glass sample is 55SiO<sub>2</sub>-6Al<sub>2</sub>O<sub>3</sub>-12Na<sub>2</sub>O-19NaF-8YF<sub>3</sub>. The sample was prepared by melt-quenching and subsequent heat-treatment. About 15 g of high-purity raw materials were mixed and ground evenly, and then placed in an alumina crucible at 1500 °C for 30 minutes in the ambient atmosphere. The melt was poured into a pre-heated brass mold at 350 °C and then cooled to room temperature to obtain precursor glass. Finally, the Yb/Er: NaYF<sub>4</sub>@glass was achieved by heating the precursor glass at 650 °C for 2 h to induce β-NaYF<sub>4</sub> crystallization.

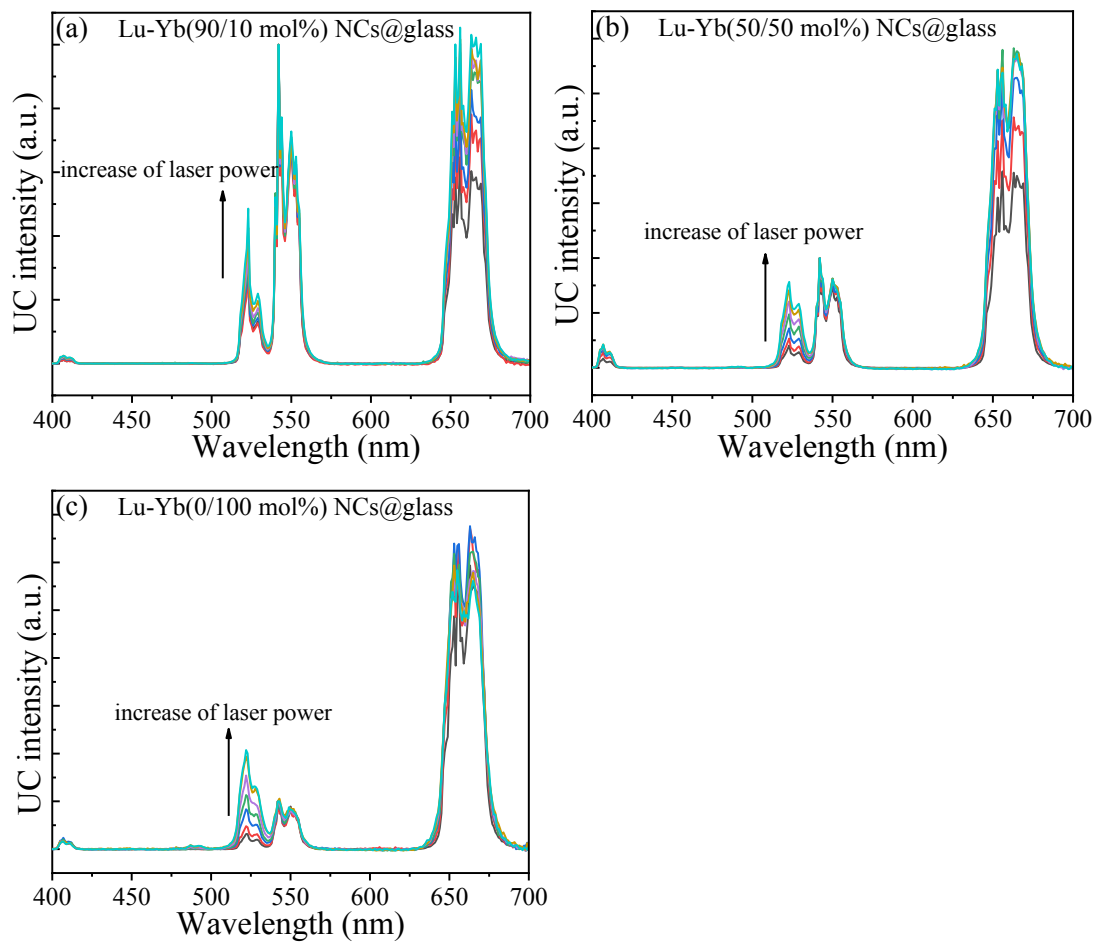

**Figure S8** Laser power dependent UC emission spectra of Er: K(Lu/Yb)<sub>2</sub>F<sub>7</sub> NCs@glass (all the spectra are normalized at Er<sup>3+</sup> 545 nm emission assigned to <sup>4</sup>S<sub>3/2</sub>→<sup>4</sup>I<sub>15/2</sub> transition): (a) 10 mol% Yb, (b) 50 mol% Yb and (c) 100 mol% Yb.
